# Supplementary material for: Environmental drivers of space-time dynamics in floodplain vegetation: grasslands as habitat for megafauna in Bardia National Park (Nepal)
Source: Copernicus journal article supplement (doi:10.5194/bg-2022-129), 2022-06-27

## Supporting Information

**Figure S1:** Mosaic of aerial photographs from 1964, with the study area delineated in red. Also shows cutting patterns in the Lamkauli phanta, where the darker shade is tall grass, and lighter shade is short grass. Courtesy of Forest Research and Training Centre, Ministry of Forests and Environment, Nepal.

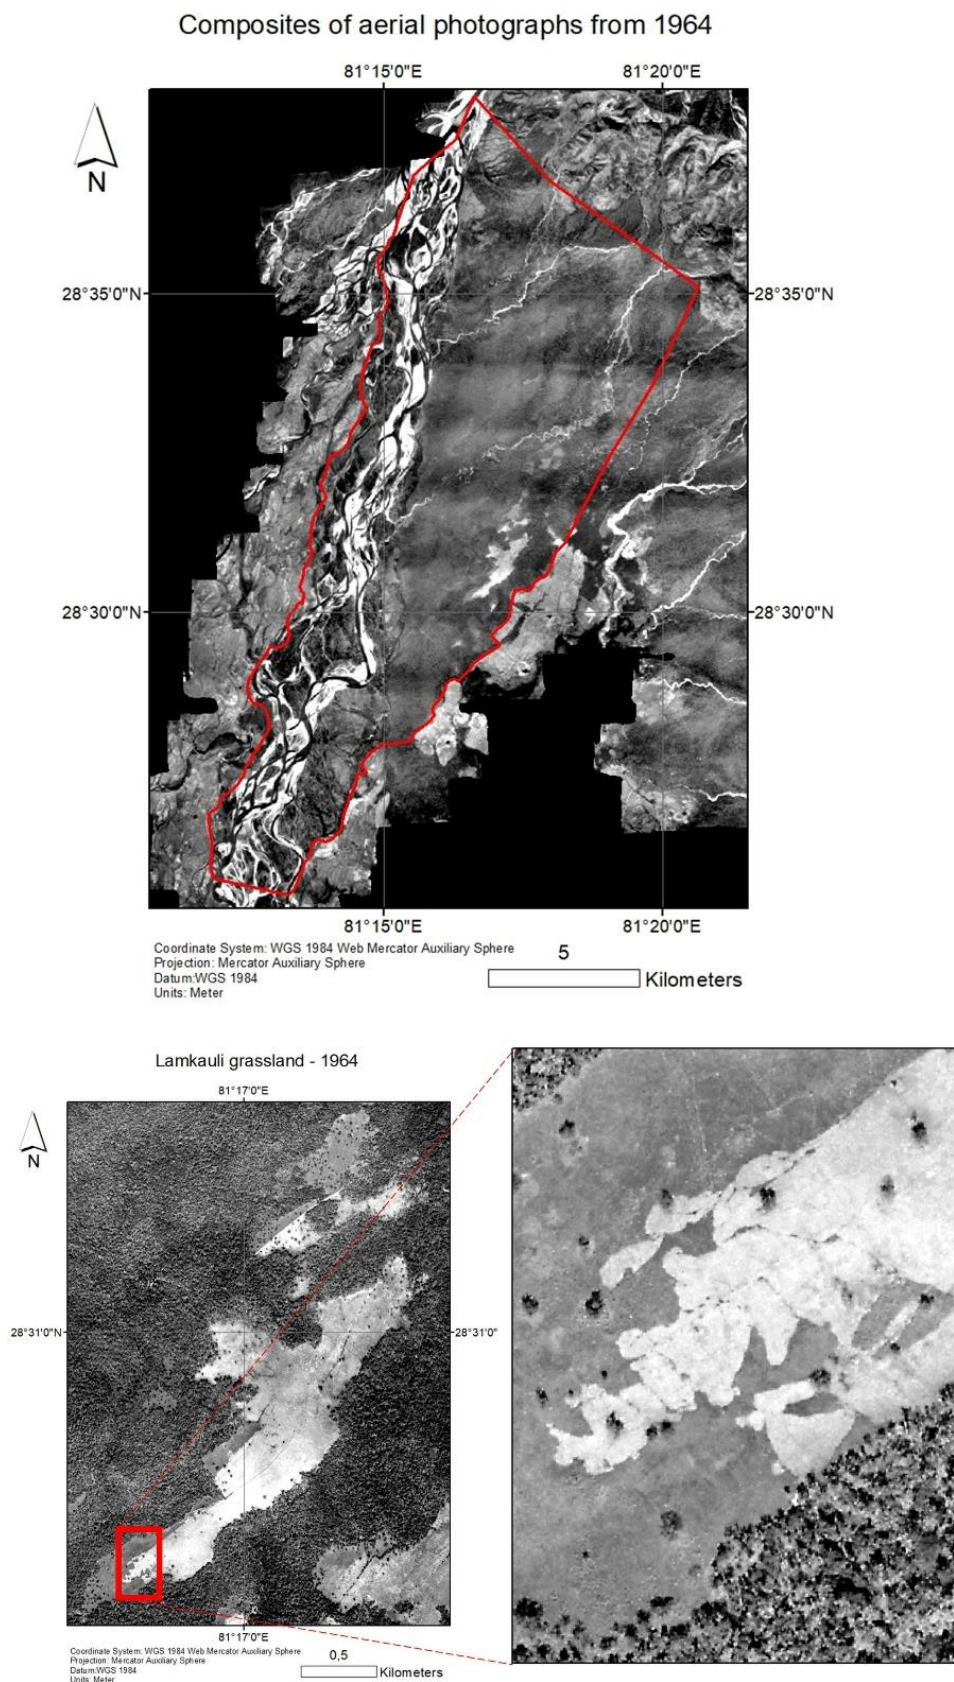

**Figure S2:** Topographic maps (1926 and 1984) based on aerial photographs. Courtesy of the Topographic Survey and Land Use Management Division, Ministry of Land Management, Cooperatives and Poverty Alleviation, Nepal.

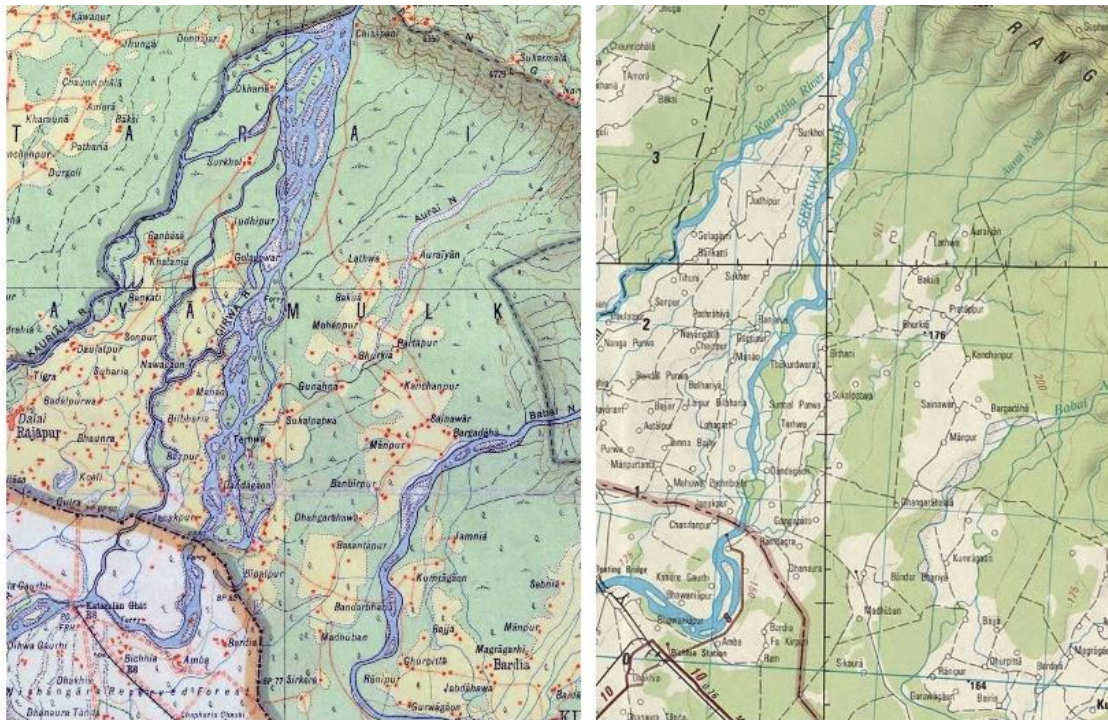

**Figure S3:** Image availability and type of sensor for the selected dates of the annual LANDSAT composites

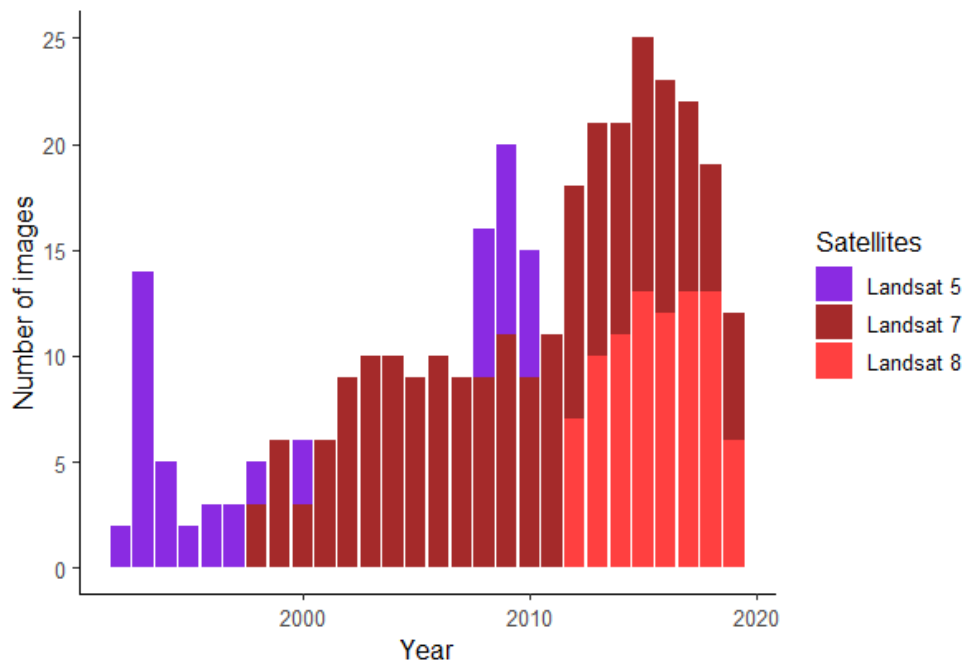

Supplement: Supplementary file 1 [file bg-2022-129-supplement.pdf]
